# Supplementary material for: Substrate-induced hydrothermal synthesis of hematite superstructures and their Fischer–Tropsch synthesis performance
Source: Royal Society of Chemistry journal article supplement (doi:10.1039/c8nj05691a), 2019-01-01
Supplement: c8nj05691a1.pdf [file c8nj05691a1.pdf]

## Electronic supporting information

### Substrate-induced Hydrothermal Synthesis of Hematite

#### Superstructure and Their Fischer-Tropsch synthesis Performance

*Yingying Xue,<sup>ab</sup> Jiaqiang Sun,<sup>a</sup> Mohamed Abbas,<sup>ac</sup> Zheng Chen,<sup>a</sup> Pengfei Wang,<sup>a</sup> Yilong Chen,<sup>d</sup> Jiangang Chen<sup>\*a</sup>*

<sup>a</sup>State Key Laboratory of Coal Conversion, Institute of Coal Chemistry, Chinese Academy of Sciences, Taiyuan, 030001, China. Email [chenjg@sxicc.ac.cn](mailto:chenjg@sxicc.ac.cn).

<sup>b</sup>Taiyuan University of Science and Technology, Taiyuan, 030024, China.

<sup>c</sup>Ceramics Department, National Research Centre, El-Bohouth Str, 12622 Cairo, Egypt.

<sup>d</sup>State Key Laboratory of Biomass Thermal Chemistry Technology, Wuhan, 430223, China

**Corresponding author:** Jiangang Chen

E-mail address: [chenjg@sxicc.ac.cn](mailto:chenjg@sxicc.ac.cn)

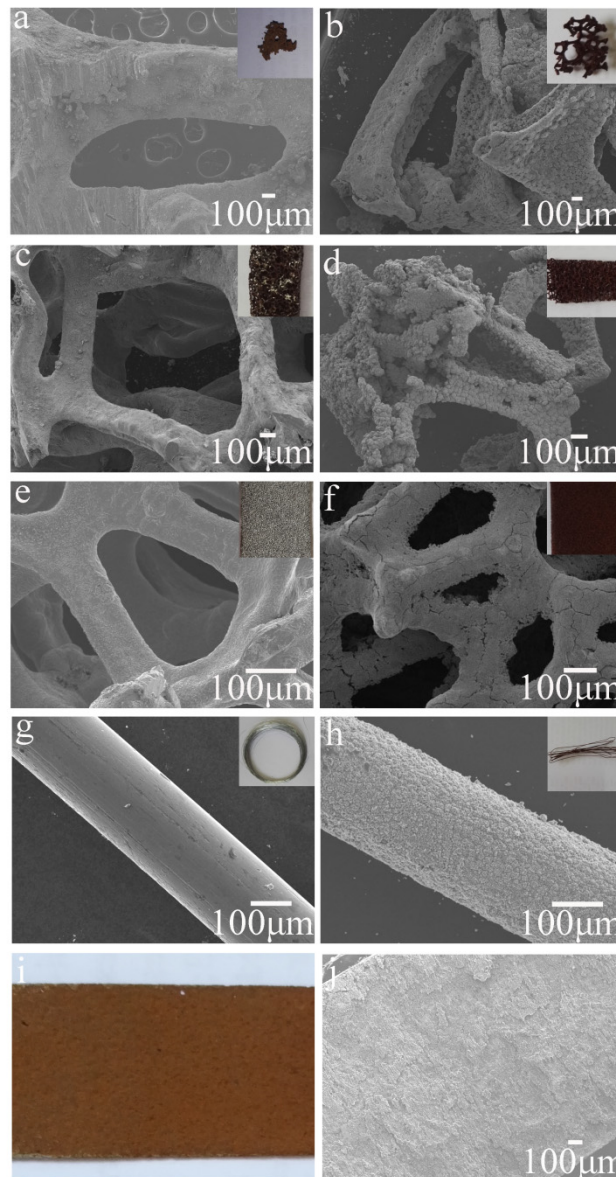

**Fig. S1** FESEM images of (a) the original 5ppi Fe foam substrate (b) the corresponding uniform growth layer of  $\alpha$ -Fe<sub>2</sub>O<sub>3</sub>, (c) the original 20ppi Fe foam substrate (d) the corresponding uniform growth layer of  $\alpha$ -Fe<sub>2</sub>O<sub>3</sub>, (e) the original 100ppi Fe foam substrate (f) the corresponding uniform growth layer of  $\alpha$ -Fe<sub>2</sub>O<sub>3</sub>, (g) the original iron wire with a diameter of 200  $\mu$ m (h) the corresponding uniform growth layer of  $\alpha$ -Fe<sub>2</sub>O<sub>3</sub>. The inserted represent the optical images of various substrates. (i) the optical image of growth layer of  $\alpha$ -Fe<sub>2</sub>O<sub>3</sub> (j) FESEM image of growth layer of  $\alpha$ -Fe<sub>2</sub>O<sub>3</sub>.

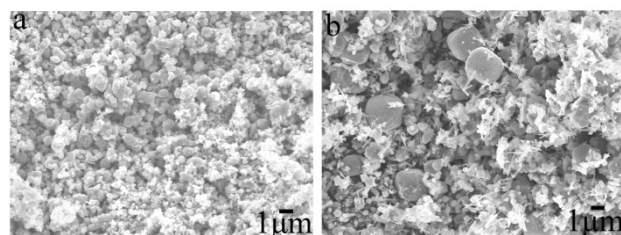

**Fig. S2** The powder in the autoclave which did not grow on the 100ppi Fe foam substrate: (a) 100ppi-Fe<sup>2+</sup>, (b) 100ppi-Fe<sup>3+</sup>.

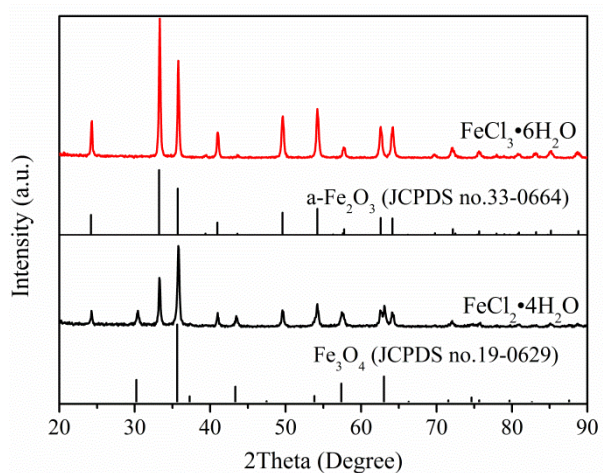

**Fig. S3** XRD patterns of the powder catalysts prepared by  $\text{FeCl}_2 \cdot 4\text{H}_2\text{O}$  and  $\text{FeCl}_3 \cdot 6\text{H}_2\text{O}$  in the absence of Fe foam substrate.

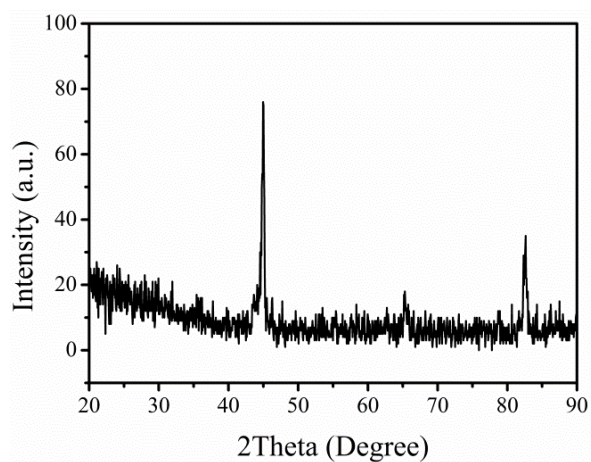

**Fig. S4** XRD pattern of 100ppi- $\text{Fe}^{2+}$  catalyst after reaction of 12 h.

**Table S1** The  $\text{Fe}^{2+}$  content determined by ORT method.

| Sample                 | 5ppi- $\text{Fe}^{2+}$ | 5ppi- $\text{Fe}^{3+}$ | 20ppi- $\text{Fe}^{2+}$ | 20ppi- $\text{Fe}^{3+}$ | 100ppi- $\text{Fe}^{2+}$ | 100ppi- $\text{Fe}^{3+}$ |
|------------------------|------------------------|------------------------|-------------------------|-------------------------|--------------------------|--------------------------|
| $\text{Fe}^{2+}$ (ORT) | 21.2                   | 6.3                    | 20.7                    | 6.8                     | 21.3                     | 7.3                      |
